# Supplementary material for: Effects of vegetation management intensity on biodiversity and ecosystem services in vineyards: A meta‐analysis
Source: PubMed Central journal article supplement (PMC6099225; doi:10.1111/1365-2664.13124), 2018-03-04
Supplement: JPE-55-2484-s004.pdf [file JPE-55-2484-s004.pdf]

**Table S1.** List of 181 datasets from 74 studies included in this meta-analysis. Irrig = irrigation;  $N$  = sample size; climate type according to Köppen–Geiger’s classification (Kottek, Grieser, Beck, Rudolf, & Rubel, 2006; med = Mediterranean, oceanic, cont-step = continental and steppe climates); study design: block/1 vin = single vineyard with randomized block design, block/sev vin = several vineyards with replicated block or vin = vineyards as replicates; control type: BS = bare soil, CO = conventional management, OT = other type of vegetation management; Veg = vegetation management: TI = tillage, HE = herbicides, OT = other type of vegetation management including combined tillage and herbicide application in inter-rows; NA – missing information; the algebraic sign of log response ratio (lnR) was changed if larger effect sizes caused an overall negative effect on ES provision, e.g. higher soil loss decreases ES provision (lnR\*); grey background: we combined effect sizes from different years, localities, taxonomic subgroups within an order or soil layers for that dataset. The source Daane & Costello 1998 includes different study sites, therefore vegetation management differs within the extracted datasets of that study.

| Source                   | Country  | ES category/<br>biodiversity | ES type/<br>biodiversity | Subset                      | Variable                        | Irrig | Climate | Study design  | Control type | Veg | $N$ | lnR*     | var    |
|--------------------------|----------|------------------------------|--------------------------|-----------------------------|---------------------------------|-------|---------|---------------|--------------|-----|-----|----------|--------|
| Adams, 2011              | USA      | provisioning                 | grape quality & quantity | grape quantity              | grape yield                     | yes   | med     | block/sev vin | BS           | HE  | 12  | -0.14165 | 0.0763 |
| Adams, 2011              | USA      | regulating                   | carbon sequestration     | soil carbon                 | soil carbon content             | yes   | med     | block/sev vin | BS           | HE  | 12  | 0        | 0.0231 |
| Amaral et al., 2012      | Brazil   | regulating                   | carbon sequestration     | soil carbon                 | soil carbon content             | no    | ozeanic | block/1 vin   | BS           | OT  | 12  | 0.0469   | 0.0009 |
| Barrio et al., 2011      | Spain    | provisioning                 | grape quality & quantity | grape quantity              | grape yield                     | no    | med     | block/sev vin | BS           | TI  | 6   | -0.3263  | 0.0098 |
| Barrio et al., 2011      | Spain    | regulating                   | pest control             | pest related param.         | damage per vine                 | no    | med     | block/sev vin | BS           | TI  | 6   | 0.27011  | 0.1086 |
| Barrio et al., 2011      | Spain    | regulating                   | pest control             | pest related param.         | damage per plot                 | no    | med     | block/sev vin | BS           | TI  | 6   | 0.05881  | 0.3369 |
| Barroso et al., 2016     | Portugal | provisioning                 | grape quality & quantity | grape quantity              | grape yield                     | no    | med     | block/1 vin   | BS           | TI  | 8   | -0.45636 | 0.0166 |
| Barroso et al., 2016     | Portugal | provisioning                 | grape quality & quantity | grape quantity              | grape yield                     | yes   | med     | block/1 vin   | BS           | TI  | 8   | -0.32424 | 0.0097 |
| Bartoli & Dousset, 2011  | France   | regulating                   | erosion protection       | erosion related soil param. | aggregate stability             | no    | ozeanic | block/1 vin   | BS           | TI  | 8   | 0.04185  | 0.0023 |
| Bartoli & Dousset, 2011  | France   | regulating                   | erosion protection       | erosion related soil param. | aggregate stability             | no    | ozeanic | block/1 vin   | BS           | TI  | 8   | 0.09641  | 0.0006 |
| Bartoli & Dousset, 2011  | France   | regulating                   | carbon sequestration     | soil carbon                 | soil carbon content             | no    | ozeanic | block/1 vin   | BS           | TI  | 8   | 0.84627  | 0.0228 |
| Baumgartner et al., 2005 | USA      | supporting                   | soil fertility           | soil biota                  | arbuscular mycorrhiza abundance | yes   | med     | block/1 vin   | BS           | TI  | 18  | 0.46705  | 0.0596 |
| Baumgartner et al., 2005 | USA      | supporting                   | soil fertility           | soil biota                  | arbuscular mycorrhiza abundance | yes   | med     | block/1 vin   | BS           | TI  | 18  | 0.64806  | 0.0691 |
| Belmonte et al., 2016    | Italy    | regulating                   | erosion protection       | erosion related soil param. | water retention                 | no    | med     | block/1 vin   | BS           | TI  | 6   | -0.01135 | 0.0018 |
| Belmonte et al., 2016    | Italy    | regulating                   | carbon sequestration     | soil carbon                 | soil carbon content             | no    | med     | block/1 vin   | BS           | TI  | 6   | 0.09442  | 0.0063 |
| Blavet et al., 2009      | France   | regulating                   | erosion protection       | soil loss                   | soil loss                       | no    | med     | block/sev vin | BS           | HE  | 6   | 0.50484  | 0.3733 |

| Source                  | Country     | ES category/<br>biodiversity | ES type/<br>biodiversity | Subset                      | Variable                                                      | Irrig | Climate | Study design | Control type | Veg | N  | lnR*     | var    |
|-------------------------|-------------|------------------------------|--------------------------|-----------------------------|---------------------------------------------------------------|-------|---------|--------------|--------------|-----|----|----------|--------|
| Botton et al., 2010     | Brazil      | regulating                   | pest control             | pest related param.         | pest abundance ( <i>Eurhizococcus brasiliensis</i> )          | no    | ozeanic | block/1 vin  | BS           | HE  | 12 | 0.9637   | 0.035  |
| Bouffaud et al., 2016   | France      | supporting                   | soil fertility           | soil biota                  | arbuscular mycorrhiza abundance                               | NA    | ozeanic | vin          | CO           | OT  | 14 | 0.19986  | 0.0479 |
| Bouffaud et al., 2016   | France      | regulating                   | carbon sequestration     | soil carbon                 | soil carbon content                                           | NA    | ozeanic | vin          | CO           | OT  | 14 | -0.37555 | 0.069  |
| Brittain et al., 2010   | Italy       | biodiversity                 | biodiversity             | fauna                       | insect pollinator abundance (butterflies, bees)               | yes   | ozeanic | vin          | CO           | OT  | 12 | 1.12393  | 0.5005 |
| Brittain et al., 2010   | Italy       | biodiversity                 | biodiversity             | fauna                       | insect pollinator morpho species richness (butterflies, bees) | yes   | ozeanic | vin          | CO           | OT  | 12 | 0.36772  | 0.1187 |
| Brittain et al., 2010   | Italy       | biodiversity                 | biodiversity             | fauna                       | insect pollinator species richness (bees)                     | yes   | ozeanic | vin          | CO           | OT  | 12 | 0.10725  | 0.0273 |
| Brittain et al., 2010   | Italy       | regulating                   | pollination              | pollination                 | seeds per plant                                               | yes   | ozeanic | vin          | CO           | OT  | 12 | -0.17398 | 0.0452 |
| Bruggisser et al., 2010 | Switzerland | biodiversity                 | biodiversity             | fauna                       | grasshopper species richness                                  | no    | ozeanic | vin          | OT           | OT  | 10 | -0.52096 | 0.0616 |
| Bruggisser et al., 2010 | Switzerland | biodiversity                 | biodiversity             | fauna                       | spider species richness                                       | no    | ozeanic | vin          | OT           | OT  | 10 | -0.04915 | 0.012  |
| Bruggisser et al., 2010 | Switzerland | biodiversity                 | biodiversity             | flora                       | plant species richness                                        | no    | ozeanic | vin          | OT           | OT  | 10 | 0.25644  | 0.11   |
| Burns et al., 2015      | USA         | regulating                   | carbon sequestration     | soil carbon                 | soil carbon content                                           | NA    | med     | vin          | BS           | TI  | 14 | 0.57521  | 0.161  |
| Caprio et al., 2015     | Italy       | biodiversity                 | biodiversity             | fauna                       | beetle abundance (carabids)                                   | no    | ozeanic | vin          | BS           | HE  | 12 | -0.51019 | 0.1982 |
| Caprio et al., 2015     | Italy       | biodiversity                 | biodiversity             | fauna                       | spider abundance                                              | no    | ozeanic | vin          | BS           | HE  | 12 | 0.32686  | 0.0428 |
| Celette et al., 2005    | France      | regulating                   | erosion protection       | erosion related soil param. | saturated hydraulic conductivity                              | no    | med     | block/1 vin  | BS           | HE  | 8  | -0.91629 | 4.7181 |
| Cluzeau et al., 2013    | France      | biodiversity                 | biodiversity             | fauna                       | earthworm species richness                                    | no    | ozeanic | vin          | BS           | HE  | 12 | 0.11665  | 0.0542 |
| Cluzeau et al., 2013    | France      | supporting                   | soil fertility           | soil biota                  | Soil fauna abundance (earthworms)                             | no    | ozeanic | vin          | BS           | HE  | 12 | -0.105   | 0.0653 |
| Coll et al., 2011       | France      | supporting                   | soil fertility           | nutrient cycling processes  | soil microbial biomass (C)                                    | no    | med     | vin          | CO           | TI  | 15 | 0.27132  | 0.0094 |
| Coll et al., 2011       | France      | supporting                   | soil fertility           | soil biota                  | Soil fauna abundance (earthworms)                             | no    | med     | vin          | CO           | TI  | 15 | -0.80178 | 0.0888 |
| Coll et al., 2011       | France      | supporting                   | soil fertility           | soil biota                  | Soil fauna abundance (nematodes)                              | no    | med     | vin          | CO           | TI  | 15 | 0.58016  | 0.1822 |
| Coll et al., 2011       | France      | regulating                   | carbon sequestration     | soil carbon                 | soil carbon content                                           | no    | med     | vin          | CO           | TI  | 15 | 0.2803   | 0.0001 |

| Source                    | Country   | ES category/<br>biodiversity | ES type/<br>biodiversity | Subset                         | Variable                                        | Irrig | Climate   | Study design | Control type | Veg | N  | lnR*     | var    |
|---------------------------|-----------|------------------------------|--------------------------|--------------------------------|-------------------------------------------------|-------|-----------|--------------|--------------|-----|----|----------|--------|
| Coll et al., 2012         | France    | supporting                   | soil fertility           | soil biota                     | Soil fauna abundance (nematodes)                | no    | med       | vin          | CO           | TI  | 15 | 0.58016  | 0.0089 |
| Costello & Danne, 1998    | USA       | regulating                   | pest control             | natural enemies related param. | abundance potential natural enemies (spider)    | yes   | med       | block/1 vin  | BS           | OT  | 10 | 0.10551  | 0.0133 |
| Costello & Danne, 2003    | USA       | biodiversity                 | biodiversity             | fauna                          | spider species richness                         | yes   | cont-step | block/1 vin  | BS           | TI  | 12 | 0.08961  | 0.0018 |
| Costello & Danne, 2003    | USA       | regulating                   | pest control             | natural enemies related param. | percentage of parasitism                        | yes   | cont-step | block/1 vin  | BS           | TI  | 12 | -0.29952 | 0.0024 |
| Costello & Danne, 2003    | USA       | regulating                   | pest control             | pest related param.            | pest abundance (leafhopper)                     | yes   | cont-step | block/1 vin  | BS           | TI  | 12 | 0.16038  | 0.0156 |
| Costello, 2010a           | USA       | regulating                   | soil water balance       | soil water balance             | volumetric soil water content                   | yes   | cont-step | block/1 vin  | BS           | TI  | 6  | -0.13278 | 0.0015 |
| Costello, 2010b           | USA       | provisioning                 | grape quality & quantity | grape quantity                 | grape yield                                     | yes   | cont-step | block/1 vin  | BS           | TI  | 6  | -0.12257 | 0.0174 |
| Daane & Costello, 1998    | USA       | regulating                   | pest control             | natural enemies related param. | percentage of parasitism                        | yes   | med       | block/1 vin  | BS           | TI  | 8  | 0.03131  | 0.0056 |
| Daane & Costello, 1998    | USA       | regulating                   | pest control             | pest related param.            | pest abundance (leafhopper)                     | yes   | cont-step | block/1 vin  | BS           | TI  | 12 | -0.7376  | 0.1669 |
| Daane & Costello, 1998    | USA       | regulating                   | pest control             | pest related param.            | pest abundance (leafhopper)                     | yes   | med       | block/1 vin  | BS           | OT  | 10 | -0.3317  | 0.0205 |
| Daane & Costello, 1998    | USA       | regulating                   | pest control             | pest related param.            | pest abundance (leafhopper)                     | yes   | med       | block/1 vin  | BS           | TI  | 8  | -0.29239 | 0.0034 |
| Danne et al., 2010        | Australia | regulating                   | pest control             | natural enemies related param. | abundance potential natural enemies (hemiptera) | yes   | cont-step | block/1 vin  | OT           | OT  | 8  | 0.154    | 0.0484 |
| Danne et al., 2010        | Australia | regulating                   | pest control             | natural enemies related param. | percentage of predation (of brown apple moths)  | yes   | cont-step | block/1 vin  | OT           | OT  | 8  | 0.34225  | 0.0238 |
| Danne et al., 2010        | Australia | regulating                   | pest control             | pest related param.            | pest abundance (coleoptera, hemiptera)          | yes   | cont-step | block/1 vin  | OT           | OT  | 8  | -0.294   | 0.1182 |
| English-Loeb et al., 2003 | USA       | regulating                   | pest control             | natural enemies related param. | abundance potential natural enemies (Anagrus)   | no    | cont-step | block/1 vin  | OT           | OT  | 8  | -0.28146 | 0.0128 |
| English-Loeb et al., 2003 | USA       | regulating                   | pest control             | natural enemies related param. | percentage of parasitism (of hemiptera)         | no    | cont-step | block/1 vin  | OT           | OT  | 8  | 0.28768  | 0.449  |
| English-Loeb et al., 2003 | USA       | regulating                   | pest control             | pest related param.            | pest abundance (leafhopper)                     | no    | cont-step | block/1 vin  | OT           | OT  | 8  | 0.44849  | 0.0039 |
| Favretto et al., 1992     | Italy     | supporting                   | soil fertility           | soil biota                     | Soil fauna abundance (invertebrates)            | no    | med       | block/1 vin  | BS           | TI  | 6  | 1.31973  | 0.3228 |
| Favretto et al., 1992     | Italy     | supporting                   | soil fertility           | soil biota                     | Soil fauna abundance (Oribatida)                | no    | med       | block/1 vin  | BS           | TI  | 6  | 1.71847  | 5.6714 |
| Favretto et al., 1992     | Italy     | supporting                   | soil fertility           | soil biota                     | Soil fauna abundance (springtails)              | no    | med       | block/1 vin  | BS           | TI  | 6  | 1.93845  | 3.2902 |

| Source                   | Country      | ES category/<br>biodiversity | ES type/<br>biodiversity | Subset                         | Variable                                               | Irrig | Climate   | Study design  | Control type | Veg | N  | lnR*     | var    |
|--------------------------|--------------|------------------------------|--------------------------|--------------------------------|--------------------------------------------------------|-------|-----------|---------------|--------------|-----|----|----------|--------|
| Favretto et al., 1992    | Italy        | regulating                   | carbon sequestration     | soil carbon                    | soil carbon content                                    | no    | med       | block/1 vin   | BS           | TI  | 6  | 0.3973   | 0.014  |
| Gaigher & Samways, 2014  | South Africa | biodiversity                 | biodiversity             | fauna                          | spider species richness                                | NA    | med       | vin           | CO           | HE  | 6  | 0.26622  | 0.0595 |
| Gaigher & Samways, 2014  | South Africa | biodiversity                 | biodiversity             | flora                          | plant species richness                                 | NA    | med       | vin           | CO           | HE  | 6  | 0.56004  | 0.0978 |
| Garcia-Diaz et al., 2017 | Spain        | regulating                   | erosion protection       | soil loss                      | soil loss                                              | no    | cont-step | block/sev vin | BS           | TI  | 24 | 1.165    | 0.7227 |
| Giese et al., 2014       | USA          | regulating                   | soil water balance       | soil water balance             | water loss                                             | no    | ozeanic   | block/1 vin   | BS           | HE  | 12 | 0.316    | 0.0017 |
| Gomez et al., 2011       | France       | regulating                   | erosion protection       | soil loss                      | soil loss                                              | no    | NA        | block/sev vin | BS           | TI  | 6  | 0.82396  | 1.3752 |
| Hanna et al., 2003       | USA          | regulating                   | pest control             | natural enemies related param. | abundance potential natural enemies (spider)           | yes   | cont-step | block/1 vin   | BS           | TI  | 6  | 0.42578  | 0.1341 |
| Hanna et al., 2003       | USA          | regulating                   | pest control             | pest related param.            | pest abundance (leafhopper)                            | yes   | cont-step | block/1 vin   | BS           | TI  | 6  | -0.20294 | 0.1327 |
| Ingels et al., 2005      | USA          | provisioning                 | grape quality & quantity | grape quality                  | sugar content                                          | yes   | med       | block/1 vin   | BS           | TI  | 8  | 0.00739  | 0.0004 |
| Ingels et al., 2005      | USA          | provisioning                 | grape quality & quantity | grape quality                  | titratable acidity                                     | yes   | med       | block/1 vin   | BS           | TI  | 8  | -0.08536 | 0.0009 |
| Ingels et al., 2005      | USA          | provisioning                 | grape quality & quantity | grape quantity                 | grape yield                                            | yes   | med       | block/1 vin   | BS           | TI  | 8  | -0.1103  | 0.0739 |
| Ingels et al., 2005      | USA          | supporting                   | soil fertility           | nutrient cycling processes     | soil microbial biomass (PLFA)                          | yes   | med       | block/1 vin   | BS           | TI  | 8  | 0.66095  | 0.0243 |
| Irvin et al., 2016       | USA          | provisioning                 | grape quality & quantity | grape quality                  | sugar content                                          | yes   | med       | vin           | BS           | TI  | 7  | -0.02335 | 0.0005 |
| Irvin et al., 2016       | USA          | provisioning                 | grape quality & quantity | grape quantity                 | grape yield                                            | yes   | med       | vin           | BS           | TI  | 7  | 0.06313  | 0.0332 |
| Irvin et al., 2016       | USA          | regulating                   | pest control             | natural enemies related param. | abundance potential natural enemies (lacewings)        | yes   | med       | vin           | BS           | TI  | 7  | -0.15341 | 0.0986 |
| Irvin et al., 2016       | USA          | regulating                   | pest control             | natural enemies related param. | abundance potential natural enemies (predatory thrips) | yes   | med       | vin           | BS           | TI  | 7  | 0.24932  | 0.0387 |
| Irvin et al., 2016       | USA          | regulating                   | pest control             | natural enemies related param. | abundance potential natural enemies (predators)        | yes   | med       | vin           | BS           | TI  | 7  | 2.55     | 36.337 |
| Irvin et al., 2016       | USA          | regulating                   | pest control             | pest related param.            | pest abundance (leafhopper)                            | yes   | med       | vin           | BS           | TI  | 7  | -0.40068 | 0.0351 |
| Isaia et al., 2006       | Italy        | regulating                   | pest control             | natural enemies related param. | abundance potential natural enemies (spider)           | no    | ozeanic   | vin           | BS           | OT  | 14 | 0.694    | 0.1853 |
| James et al., 2015       | USA          | biodiversity                 | biodiversity             | fauna                          | insect pollinator species richness (butterflies)       | yes   | NA        | vin           | BS           | HE  | 8  | 0.71473  | 0.1053 |

| Source                   | Country      | ES category/<br>biodiversity | ES type/<br>biodiversity | Subset                     | Variable                                | Irrig | Climate | Study design | Control type | Veg | N  | lnR*     | var      |
|--------------------------|--------------|------------------------------|--------------------------|----------------------------|-----------------------------------------|-------|---------|--------------|--------------|-----|----|----------|----------|
| James et al., 2015       | USA          | biodiversity                 | biodiversity             | flora                      | plant species richness                  | yes   | NA      | vin          | BS           | HE  | 8  | 1.68682  | 0.386    |
| Kehinde & Samways, 2012  | South Africa | biodiversity                 | biodiversity             | fauna                      | insect pollinator species richness      | NA    | med     | vin          | CO           | OT  | 12 | -0.1431  | 0.1295   |
| Kehinde & Samways, 2012  | South Africa | biodiversity                 | biodiversity             | fauna                      | beetle species richness (monkey beetle) | NA    | med     | vin          | CO           | OT  | 12 | 0.22314  | 0.3233   |
| Kehinde & Samways, 2014a | South Africa | biodiversity                 | biodiversity             | fauna                      | insect pollinator species richness      | NA    | med     | vin          | CO           | OT  | 10 | 0        | 0.0782   |
| Kehinde & Samways, 2014a | South Africa | regulating                   | pollination              | pollination                | flower visitations                      | NA    | med     | vin          | CO           | OT  | 10 | 0.4454   | 1.6208   |
| Kehinde & Samways, 2014b | South Africa | biodiversity                 | biodiversity             | flora                      | flowering plant species richness        | NA    | med     | vin          | CO           | OT  | 10 | 0.10725  | 0.1963   |
| King & Berry, 2005       | USA          | supporting                   | soil fertility           | nutrient cycling processes | soil macronutrient content (N)          | yes   | med     | block/1 vin  | OT           | OT  | 10 | -0.16705 | 0.0014   |
| Klymenko, 2014           | Ukraine      | provisioning                 | grape quality & quantity | grape quality              | sugar content                           | yes   | ozeanic | block/1 vin  | OT           | OT  | 8  | 0.01105  | 0.0013   |
| Klymenko, 2014           | Ukraine      | provisioning                 | grape quality & quantity | grape quality              | titratable acidity                      | yes   | ozeanic | block/1 vin  | OT           | OT  | 8  | -0.02532 | 0.004    |
| Klymenko, 2014           | Ukraine      | provisioning                 | grape quality & quantity | grape quantity             | grape yield                             | yes   | ozeanic | block/1 vin  | OT           | OT  | 8  | 0.01905  | 0.0029   |
| Lee & Steenwerth, 2013   | USA          | provisioning                 | grape quality & quantity | grape quality              | sugar content                           | yes   | med     | block/1 vin  | BS           | TI  | 6  | -0.02151 | 0.001    |
| Lee & Steenwerth, 2013   | USA          | provisioning                 | grape quality & quantity | grape quality              | titratable acidity                      | yes   | med     | block/1 vin  | BS           | TI  | 6  | -0.02667 | 0.0014   |
| Lee & Steenwerth, 2013   | USA          | provisioning                 | grape quality & quantity | grape quantity             | grape yield                             | yes   | med     | block/1 vin  | BS           | TI  | 6  | -0.08499 | 0.0031   |
| Marques et al., 2010     | Spain        | provisioning                 | grape quality & quantity | grape quality              | titratable acidity                      | no    | med     | block/1 vin  | BS           | TI  | 6  | -0.03241 | 0.0043   |
| Marques et al., 2010     | Spain        | provisioning                 | grape quality & quantity | grape quantity             | grape yield                             | no    | med     | block/1 vin  | BS           | TI  | 6  | -0.21283 | 0.0096   |
| Marques et al., 2010     | Spain        | regulating                   | carbon sequestration     | soil carbon                | soil carbon content                     | no    | med     | block/1 vin  | BS           | TI  | 6  | 0.06899  | 0.0015   |
| Marques et al., 2010     | Spain        | regulating                   | erosion protection       | soil loss                  | soil loss                               | no    | med     | block/1 vin  | BS           | TI  | 6  | 3.21999  | 137.84   |
| Mercenaro et al., 2014   | Italy        | provisioning                 | grape quality & quantity | grape quality              | sugar content                           | yes   | med     | block/1 vin  | BS           | TI  | 8  | 0.04674  | 0.0007   |
| Mercenaro et al., 2014   | Italy        | provisioning                 | grape quality & quantity | grape quality              | titratable acidity                      | yes   | med     | block/1 vin  | BS           | TI  | 8  | -0.07551 | 0.0028   |
| Mercenaro et al., 2014   | Italy        | provisioning                 | grape quality & quantity | grape quantity             | grape yield                             | yes   | med     | block/1 vin  | BS           | TI  | 8  | 0.2734   | 0.0185   |
| Morlat & Jacquet, 2003   | France       | regulating                   | carbon sequestration     | soil carbon                | soil carbon content                     | no    | ozeanic | block/1 vin  | BS           | HE  | 12 | 0.31845  | 3,66E-05 |
| Muscas et al., 2017      | Italy        | provisioning                 | grape quality & quantity | grape quantity             | grape yield                             | yes   | med     | block/1 vin  | BS           | TI  | 8  | -0.3083  | 0.0149   |

| Source                  | Country | ES category/<br>biodiversity | ES type/<br>biodiversity | Subset                     | Variable                            | Irrig | Climate | Study design | Control type | Veg | N  | lnR*     | var    |
|-------------------------|---------|------------------------------|--------------------------|----------------------------|-------------------------------------|-------|---------|--------------|--------------|-----|----|----------|--------|
| Muscas et al.. 2017     | Italy   | regulating                   | pest control             | pest related param.        | pest abundance (mealy bugs)         | yes   | med     | block/1 vin  | BS           | TI  | 8  | 0.08818  | 0.0009 |
| Nascimbene et al.. 2012 | Italy   | biodiversity                 | biodiversity             | flora                      | annual plant species richness       | no    | ozeanic | vin          | CO           | OT  | 18 | 0.10285  | 0.0266 |
| Nascimbene et al.. 2012 | Italy   | biodiversity                 | biodiversity             | flora                      | perennial plant species richness    | no    | ozeanic | vin          | CO           | OT  | 18 | 0.40834  | 0.0243 |
| Novara et al.. 2011     | Italy   | regulating                   | erosion protection       | soil loss                  | soil loss                           | yes   | med     | block/1 vin  | BS           | TI  | 6  | 0.13118  | 0.0153 |
| Novara et al.. 2011     | Italy   | regulating                   | erosion protection       | soil loss                  | soil loss                           | yes   | med     | block/1 vin  | BS           | TI  | 6  | 1.15893  | 0.0027 |
| Okur et al.. 2015       | Turkey  | provisioning                 | grape quality & quantity | grape quality              | sugar content                       | yes   | med     | block/1 vin  | BS           | TI  | 6  | 0.02208  | 0.1193 |
| Okur et al.. 2015       | Turkey  | provisioning                 | grape quality & quantity | grape quality              | titratable acidity                  | yes   | med     | block/1 vin  | BS           | TI  | 6  | -0.02684 | 0.1102 |
| Okur et al.. 2015       | Turkey  | provisioning                 | grape quality & quantity | grape quantity             | grape yield                         | yes   | med     | block/1 vin  | BS           | TI  | 6  | -0.35858 | 0.0606 |
| Okur et al.. 2015       | Turkey  | supporting                   | soil fertility           | nutrient cycling processes | microbial respiration               | yes   | med     | block/1 vin  | BS           | TI  | 6  | 0.44428  | 0.0626 |
| Okur et al.. 2015       | Turkey  | supporting                   | soil fertility           | nutrient cycling processes | soil macronutrient content (N)      | yes   | med     | block/1 vin  | BS           | TI  | 6  | 0.54267  | 0.1157 |
| Okur et al.. 2015       | Turkey  | supporting                   | soil fertility           | nutrient cycling processes | soil macronutrient availability (P) | yes   | med     | block/1 vin  | BS           | TI  | 6  | 0.47853  | 0.0628 |
| Okur et al., 2015       | Turkey  | regulating                   | carbon sequestration     | soil carbon                | soil carbon content                 | yes   | med     | block/1 vin  | BS           | TI  | 6  | 0.69315  | 0.0066 |
| Ovalle et al.. 2010     | Chile   | provisioning                 | grape quality & quantity | grape quantity             | grape yield                         | yes   | med     | block/1 vin  | BS           | TI  | 8  | 0.39375  | 0.0063 |
| Paoletti et al.. 1998   | Italy   | biodiversity                 | biodiversity             | fauna                      | earthworm species richness          | NA    | ozeanic | vin          | BS           | TI  | 16 | 1.01983  | 0.1345 |
| Paoletti et al.. 2015   | Italy   | biodiversity                 | biodiversity             | fauna                      | beetle abundance (carabids)         | NA    | ozeanic | vin          | CO           | OT  | 10 | -0.18913 | 0.1525 |
| Paoletti et al.. 2015   | Italy   | supporting                   | soil fertility           | nutrient cycling processes | soil microbial activity             | NA    | ozeanic | vin          | CO           | OT  | 10 | 0.3543   | 0.1267 |
| Paoletti et al.. 2015   | Italy   | supporting                   | soil fertility           | soil biota                 | Soil fauna abundance (springtails)  | NA    | ozeanic | vin          | CO           | OT  | 10 | -0.14081 | 0.2729 |
| Paoletti et al.. 2015   | Italy   | supporting                   | soil fertility           | soil biota                 | Soil fauna abundance (Oribatida)    | NA    | ozeanic | vin          | CO           | OT  | 10 | 0.13127  | 0.1355 |
| Paoletti et al.. 2015   | Italy   | supporting                   | soil fertility           | soil biota                 | Soil fauna abundance (earthworms)   | NA    | ozeanic | vin          | CO           | OT  | 10 | 0.71868  | 0.2353 |
| Paoletti et al.. 2015   | Italy   | supporting                   | soil fertility           | soil biota                 | biological quality indicator        | NA    | ozeanic | vin          | CO           | OT  | 10 | 0.14027  | 0.0067 |
| Peregrina et al.. 2012  | Spain   | regulating                   | carbon sequestration     | soil carbon                | soil carbon content                 | yes   | ozeanic | block/1 vin  | BS           | TI  | 18 | 0.8086   | 0.0002 |
| Pèrès et al.. 2008      | France  | biodiversity                 | biodiversity             | fauna                      | earthworm species richness          | no    | ozeanic | vin          | BS           | HE  | 8  | 0        | 0.0315 |
| Pèrès et al.. 2008      | France  | supporting                   | soil fertility           | soil biota                 | Soil fauna abundance (earthworms)   | no    | ozeanic | vin          | BS           | HE  | 8  | -0.80104 | 0.0366 |

| Source                         | Country      | ES category/<br>biodiversity | ES type/<br>biodiversity | Subset                      | Variable                       | Irrig | Climate | Study design  | Control type | Veg | N  | lnR*     | var    |
|--------------------------------|--------------|------------------------------|--------------------------|-----------------------------|--------------------------------|-------|---------|---------------|--------------|-----|----|----------|--------|
| Pérez -Álvarez et al.. 2013    | Spain        | provisioning                 | grape quality & quantity | grape quantity              | grape yield                    | no    | ozeanic | block/1 vin   | BS           | TI  | 6  | 0.08701  | 0.0112 |
| Pérez -Álvarez et al.. 2013    | Spain        | supporting                   | soil fertility           | nutrient cycling processes  | soil macronutrient content (N) | no    | ozeanic | block/1 vin   | BS           | TI  | 6  | -0.83397 | 0.0162 |
| Pérez -Álvarez et al.. 2015    | Spain        | provisioning                 | grape quality & quantity | grape quality               | titratable acidity             | no    | ozeanic | block/1 vin   | BS           | TI  | 6  | 0.06585  | 0.0033 |
| Pérez -Álvarez et al.. 2015    | Spain        | provisioning                 | grape quality & quantity | grape quality               | sugar content                  | no    | ozeanic | block/1 vin   | BS           | TI  | 6  | -0.01563 | 0.0004 |
| Pérez -Álvarez et al.. 2015    | Spain        | provisioning                 | grape quality & quantity | grape quantity              | grape yield                    | no    | ozeanic | block/1 vin   | BS           | TI  | 6  | 0.09706  | 0.0205 |
| Pérez -Álvarez et al.. 2015    | Spain        | supporting                   | soil fertility           | nutrient cycling processes  | soil macronutrient content (N) | no    | ozeanic | block/1 vin   | BS           | TI  | 18 | -0.05397 | 0.0016 |
| Pou et al.. 2011               | Spain        | provisioning                 | grape quality & quantity | grape quantity              | grape yield                    | yes   | med     | block/1 vin   | BS           | TI  | 8  | -0.12768 | 0.0858 |
| Pou et al.. 2011               | Spain        | regulating                   | carbon sequestration     | soil carbon                 | soil carbon content            | yes   | med     | block/1 vin   | BS           | TI  | 8  | -0.1466  | 0.0065 |
| Probst et al.. 2008            | France       | supporting                   | soil fertility           | nutrient cycling processes  | microbial respiration          | no    | ozeanic | vin           | BS           | TI  | 8  | 0.21468  | 0.1685 |
| Probst et al.. 2008            | France       | supporting                   | soil fertility           | nutrient cycling processes  | soil microbial biomass (C)     | no    | ozeanic | vin           | BS           | TI  | 8  | 0.21654  | 0.1196 |
| Probst et al.. 2008            | France       | regulating                   | carbon sequestration     | soil carbon                 | soil carbon content            | no    | ozeanic | vin           | BS           | TI  | 8  | -0.03625 | 0.061  |
| Reeve et al.. 2016             | USA          | provisioning                 | grape quality & quantity | grape quality               | sugar content                  | no    | med     | block/1 vin   | BS           | TI  | 10 | -0.06424 | 0.0008 |
| Reeve et al.. 2016             | USA          | provisioning                 | grape quality & quantity | grape quality               | titratable acidity             | no    | med     | block/1 vin   | BS           | TI  | 10 | -0.08811 | 0.0014 |
| Reeve et al.. 2016             | USA          | provisioning                 | grape quality & quantity | grape quality               | yeast assimilable nitrogen     | no    | med     | block/1 vin   | BS           | TI  | 10 | -0.95827 | 0.0258 |
| Reeve et al.. 2016             | USA          | provisioning                 | grape quality & quantity | grape quantity              | grape yield                    | no    | med     | block/1 vin   | BS           | TI  | 10 | -0.20479 | 0.0048 |
| Reeve et al.. 2016             | USA          | regulating                   | soil water balance       | soil water balance          | volumetric soil water content  | no    | med     | block/1 vin   | BS           | TI  | 10 | -0.1338  | 0.0009 |
| Reinecke et al.. 2008          | South Africa | supporting                   | soil fertility           | nutrient cycling processes  | soil fauna feeding activity    | no    | med     | block/1 vin   | CO           | HE  | 8  | 1.52819  | 0.0144 |
| Rodriguez Lovelle et al.. 2000 | France       | provisioning                 | grape quality & quantity | grape quantity              | grape yield                    | no    | ozeanic | block/sev vin | BS           | TI  | 10 | -0.56497 | 0.0322 |
| Ruiz-Colmenero et al.. 2011    | Spain        | provisioning                 | grape quality & quantity | grape quantity              | grape yield                    | no    | med     | block/sev vin | BS           | TI  | 18 | -1.093   | 0.0354 |
| Ruiz-Colmenero et al.. 2011    | Spain        | regulating                   | erosion protection       | soil loss                   | soil loss                      | no    | med     | block/sev vin | BS           | TI  | 6  | 2.33752  | 19.962 |
| Ruiz-Colmenero et al.. 2011    | Spain        | regulating                   | soil water balance       | soil water balance          | volumetric soil water content  | no    | med     | block/sev vin | BS           | TI  | 18 | -0.333   | 0.0063 |
| Ruiz-Colmenero et al.. 2013    | Spain        | regulating                   | erosion protection       | erosion related soil param. | aggregate stability            | no    | med     | block/1 vin   | BS           | TI  | 6  | 0.72951  | 0.3601 |

| Source                      | Country   | ES category/<br>biodiversity | ES type/<br>biodiversity | Subset                         | Variable                                                | Irrig | Climate   | Study design | Control type | Veg | N  | lnR*     | var    |
|-----------------------------|-----------|------------------------------|--------------------------|--------------------------------|---------------------------------------------------------|-------|-----------|--------------|--------------|-----|----|----------|--------|
| Ruiz-Colmenero et al.. 2013 | Spain     | regulating                   | carbon sequestration     | soil carbon                    | soil carbon content                                     | no    | med       | block/1 vin  | BS           | TI  | 8  | 0.38015  | 0.0087 |
| Ruiz-Colmenero et al.. 2013 | Spain     | regulating                   | erosion protection       | soil loss                      | soil loss                                               | no    | med       | block/1 vin  | BS           | TI  | 6  | 1.64998  | 5.4201 |
| Ruiz-Colmenero et al.. 2013 | Spain     | regulating                   | erosion protection       | soil loss                      | soil loss                                               | no    | med       | block/1 vin  | BS           | TI  | 6  | 2.68383  | 7.3597 |
| Rusch et al.. 2017          | France    | regulating                   | pest control             | natural enemies related param. | percentage of predation (avian predation marks)         | no    | ozeanic   | vin          | OT           | TI  | 20 | -0.53063 | 0.0867 |
| Rusch et al.. 2017          | France    | regulating                   | pest control             | natural enemies related param. | percentage of predation (of grape berry moths)          | no    | ozeanic   | vin          | OT           | TI  | 20 | 0.11702  | 0.041  |
| Rusch et al.. 2017          | France    | regulating                   | pest control             | pest related param.            | pest abundance (grape berry moth)                       | no    | ozeanic   | vin          | OT           | TI  | 20 | 1.5433   | 0.5211 |
| Salomé et al.. 2016         | France    | supporting                   | soil fertility           | soil biota                     | Soil fauna abundance (nematodes)                        | no    | med       | vin          | BS           | TI  | 11 | 0.75977  | 0.0236 |
| Salomé et al.. 2016         | France    | regulating                   | carbon sequestration     | soil carbon                    | soil carbon content                                     | no    | med       | vin          | BS           | TI  | 46 | 0.39177  | 0.0472 |
| Sharley et al.. 2008        | Australia | regulating                   | pest control             | natural enemies related param. | abundance potential natural enemies (coleoptera)        | yes   | cont-step | block/1 vin  | BS           | TI  | 10 | -0.29627 | 8.7978 |
| Sharley et al.. 2008        | Australia | regulating                   | pest control             | natural enemies related param. | abundance potential natural enemies (parasitoids)       | yes   | cont-step | block/1 vin  | BS           | TI  | 10 | 0.25886  | 0.3266 |
| Sharley et al.. 2008        | Australia | regulating                   | pest control             | natural enemies related param. | abundance potential natural enemies (spider)            | yes   | cont-step | block/1 vin  | BS           | TI  | 10 | 0.31366  | 10.005 |
| Sharley et al.. 2008        | Australia | regulating                   | pest control             | natural enemies related param. | abundance potential natural enemies (dermaptera)        | yes   | cont-step | block/1 vin  | BS           | TI  | 10 | 0.38396  | 4.7694 |
| Sharley et al., 2008        | Australia | regulating                   | pest control             | natural enemies related param. | abundance potential natural enemies (lithobiida)        | yes   | cont-step | block/1 vin  | BS           | TI  | 10 | 0.69315  | 38.32  |
| Sharley et al.. 2008        | Australia | regulating                   | pest control             | natural enemies related param. | abundance potential natural enemies (ants)              | yes   | cont-step | block/1 vin  | BS           | TI  | 10 | 0.76414  | 26.517 |
| Sharley et al.. 2008        | Australia | regulating                   | pest control             | natural enemies related param. | abundance potential natural enemies (trichogrammatidae) | yes   | cont-step | block/1 vin  | BS           | TI  | 10 | 0.78846  | 4.0435 |
| Smith et al.. 2008          | USA       | supporting                   | soil fertility           | nutrient cycling processes     | soil microbial biomass (C)                              | yes   | med       | block/1 vin  | BS           | TI  | 6  | 0.64378  | 0.008  |
| Smith et al.. 2008          | USA       | supporting                   | soil fertility           | soil biota                     | arbuscular mycorrhiza abundance                         | yes   | med       | block/1 vin  | BS           | TI  | 6  | 0.21424  | 0.0247 |
| Steenwerth & Belina. 2008   | USA       | supporting                   | soil fertility           | nutrient cycling processes     | microbial respiration                                   | no    | med       | block/1 vin  | BS           | TI  | 12 | 0.98415  | 0.0403 |
| Steenwerth & Belina. 2008   | USA       | supporting                   | soil fertility           | nutrient cycling processes     | soil microbial biomass (C)                              | no    | med       | block/1 vin  | BS           | TI  | 12 | 0.48053  | 0.3012 |



| Source                     | Country | ES category/<br>biodiversity | ES type/<br>biodiversity | Subset                      | Variable                       | Irrig | Climate | Study design | Control type | Veg | N  | lnR*     | var    |
|----------------------------|---------|------------------------------|--------------------------|-----------------------------|--------------------------------|-------|---------|--------------|--------------|-----|----|----------|--------|
| Steenwerth & Belina. 2008  | USA     | supporting                   | soil fertility           | nutrient cycling processes  | soil macronutrient content (N) | yes   | med     | block/1 vin  | BS           | TI  | 12 | 0.10763  | 0.004  |
| Steenwerth & Belina. 2008  | USA     | regulating                   | carbon sequestration     | soil carbon                 | soil carbon content            | no    | med     | block/1 vin  | BS           | TI  | 12 | 0.27472  | 0.0001 |
| Steenwerth et al.. 2013    | USA     | provisioning                 | grape quality & quantity | grape quantity              | grape yield                    | yes   | med     | vin          | BS           | TI  | 16 | 0.40943  | 0.0187 |
| Sweet & Schreiner. 2010    | USA     | provisioning                 | grape quality & quantity | grape quality               | sugar content                  | no    | med     | block/1 vin  | BS           | TI  | 8  | 0.00425  | 0.0002 |
| Sweet & Schreiner. 2010    | USA     | provisioning                 | grape quality & quantity | grape quality               | titratable acidity             | no    | med     | block/1 vin  | BS           | TI  | 8  | -0.0735  | 0.0044 |
| Sweet & Schreiner. 2010    | USA     | provisioning                 | grape quality & quantity | grape quality               | yeast assimilable nitrogen     | no    | med     | block/1 vin  | BS           | TI  | 8  | -0.16705 | 0.0223 |
| Sweet & Schreiner. 2010    | USA     | provisioning                 | grape quality & quantity | grape quantity              | grape yield                    | no    | med     | block/1 vin  | BS           | TI  | 8  | 0.02575  | 0.0078 |
| Sweet & Schreiner. 2010    | USA     | regulating                   | soil water balance       | soil water balance          | volumetric soil water content  | no    | med     | block/1 vin  | BS           | TI  | 8  | -0.06328 | 0.0014 |
| Trigo-Córdoba et al.. 2015 | Spain   | provisioning                 | grape quality & quantity | grape quality               | sugar content                  | no    | med     | block/1 vin  | BS           | TI  | 6  | -0.01762 | 0.0009 |
| Trigo-Córdoba et al.. 2015 | Spain   | provisioning                 | grape quality & quantity | grape quality               | titratable acidity             | no    | med     | block/1 vin  | BS           | TI  | 6  | -0.04546 | 0.0279 |
| Trigo-Córdoba et al.. 2015 | Spain   | provisioning                 | grape quality & quantity | grape quantity              | grape yield                    | no    | med     | block/1 vin  | BS           | TI  | 6  | -0.25932 | 0.0971 |
| Trigo-Córdoba et al.. 2015 | Spain   | regulating                   | soil water balance       | soil water balance          | water stress integral          | no    | med     | block/1 vin  | BS           | TI  | 6  | -0.21476 | 0.001  |
| Verhulst et al.. 2004      | Hungary | biodiversity                 | biodiversity             | fauna                       | bird species richness          | NA    | ozeanic | vin          | OT           | OT  | 44 | 0.78276  | 0.0284 |
| Virto et al.. 2012         | Spain   | regulating                   | erosion protection       | erosion related soil param. | aggregate stability            | no    | ozeanic | block/1 vin  | BS           | OT  | 8  | 1.98874  | 2.4608 |
| Virto et al.. 2012         | Spain   | regulating                   | erosion protection       | erosion related soil param. | topsoil penetration resistance | no    | ozeanic | block/1 vin  | BS           | OT  | 8  | 2.68558  | 22.334 |
| Virto et al.. 2012         | Spain   | regulating                   | erosion protection       | erosion related soil param. | water retention                | no    | ozeanic | block/1 vin  | BS           | OT  | 8  | 0.30713  | 0.0035 |
| Virto et al.. 2012         | Spain   | supporting                   | soil fertility           | nutrient cycling processes  | soil microbial biomass (C)     | no    | ozeanic | block/1 vin  | BS           | OT  | 8  | 0.52798  | 0.0009 |
| Virto et al.. 2012         | Spain   | regulating                   | carbon sequestration     | soil carbon                 | soil carbon content            | no    | ozeanic | block/1 vin  | BS           | OT  | 8  | 0.31197  | 0.0134 |
| Virto et al., 2012         | Spain   | regulating                   | carbon sequestration     | soil carbon                 | soil carbon content            | no    | ozeanic | block/1 vin  | BS           | OT  | 8  | 1.15315  | 1.1917 |
