# Supplementary material for: Effects of vegetation management intensity on biodiversity and ecosystem services in vineyards: A meta‐analysis
Source: PubMed Central journal article supplement (PMC6099225; doi:10.1111/1365-2664.13124), 2018-03-04
Supplement: JPE-55-2484-s005.pdf [file JPE-55-2484-s005.pdf]

**Table S2.** Summary table of the tests of moderators, associated heterogeneities (Q) and AICc values for each model without intercept, which decreased AICc values relative to the null model (climate did not improve model fit, therefore not shown; for ecosystem service type and categories see Table 1). As models including irrigation had a lower overall sample size, a separate mixed-effects models is presented.

| <b>Dataset</b>                             | <b>Moderators/Residuals</b>       | <b>d.f.</b> | <b>Q</b> | <b>P</b>      | <b>AICc</b>   |
|--------------------------------------------|-----------------------------------|-------------|----------|---------------|---------------|
| Full dataset<br>(n = 181)                  | Null model (no moderator)         | 180         | 6085.80  | <0.0001       | 483.49        |
|                                            | <b>Vegetation management</b>      | 3           | 20.28    | 0.0001        | 482.36        |
|                                            | Residual                          | 178         | 5644.83  | <0.0001       |               |
|                                            | <b>Study design</b>               | 3           | 22.09    | <0.0001       | 480.65        |
|                                            | Residual                          | 178         | 5967.24  | <0.0001       |               |
|                                            | <b>Ecosystem Service category</b> | 4           | 48.51    | <0.0001       | 462.09        |
|                                            | Residual                          | 177         | 4308.79  | <0.0001       |               |
|                                            | <b>Ecosystem Service type</b>     | 8           | 86.67    | <0.0001       | <b>438.31</b> |
|                                            | Residual                          | 173         | 3271.56  | <0.0001       |               |
| Reduced dataset<br>irrigation<br>(n = 163) | Null model (no moderator)         | 162         | 6057.19  | <0.0001       | 464.42        |
|                                            | <b>Vegetation management</b>      | 3           | 16.50    | 0.0009        | 463.26        |
|                                            | Residual                          | 160         | 5615.68  | <0.0001       |               |
|                                            | <b>Irrigation</b>                 | 2           | 14.81    | 0.0006        | 463.49        |
|                                            | Residual                          | 161         | 6047.82  | <0.0001       |               |
|                                            | <b>Study design</b>               | 3           | 17.14    | 0.0007        | 462.30        |
|                                            | Residual                          | 160         | 5938.66  | <0.0001       |               |
|                                            | <b>Treatment-Control type</b>     | 3           | 18.66    | 0.0003        | 461.01        |
|                                            | Residual                          | 160         | 5875.15  | <0.0001       |               |
|                                            | <b>Ecosystem Service category</b> | 4           | 45.09    | <0.0001       | 442.96        |
|                                            | Residual                          | 159         | 4273.33  | <0.0001       |               |
| <b>Ecosystem Service type</b>              | 8                                 | 84.85       | <0.0001  | <b>418.17</b> |               |
| Residual                                   | 155                               | 3234.99     | <0.0001  |               |               |
