# Supplementary material for: Effects of vegetation management intensity on biodiversity and ecosystem services in vineyards: A meta‐analysis
Source: PubMed Central journal article supplement (PMC6099225; doi:10.1111/1365-2664.13124), 2018-03-04
Supplement: JPE-55-2484-s007.pdf [file JPE-55-2484-s007.pdf]

## Appendix S2. References of studies included in this meta-analysis

- Adams, K. E. (2011). *Influence of Vineyard Floor Management Practices on Soil Aggregate Stability, Total Soil Carbon and Grapevine Yield*. Master thesis. California Polytechnic State University. <https://doi.org/10.15368/theses.2011.170>
- Amaral, H. F., Sena, J. O. A., Andrade, D. S., Jácome, A. G., & Caldas, R. G. (2012). Carbon and soil microbial respiration in soil from conventional, organic vineyards and comparison with an adjacent forest. *Semina: Ciências Agrárias*, 33, 437–448. <http://doi.org/10.5433/1679-0359.2012v33n2p437>
- Barrio, I. C., Villafuerte, R., & Tortosa, F. S. (2011). Can cover crops reduce rabbit-induced damages in vineyards in southern Spain? *Wildlife Biology*, 18, 88–96. <http://doi.org/10.2981/10-110>
- Barroso, J. M., Pombeiro, L., & Rato, A. E. (2016). Impacts of crop level, soil and irrigation management in grape berries of cv “Trincadeira” (*Vitis vinifera* L.). *Journal of Wine Research*, 28, 1–12. <http://doi.org/10.1080/09571264.2016.1238350>
- Bartoli, F., & Dousset, S. (2011). Impact of organic inputs on wettability characteristics and structural stability in silty vineyard topsoil. *European Journal of Soil Science*, 62, 183–194. <http://doi.org/10.1111/j.1365-2389.2010.01337.x>
- Baumgartner, K., Smith, R. F., & Bettiga, L. (2005). Weed control and cover crop management affect mycorrhizal colonization of grapevine roots and arbuscular mycorrhizal fungal spore populations in a California vineyard. *Mycorrhiza*, 15, 111–119. <http://doi.org/10.1007/s00572-004-0309-2>
- Belmonte, S. A., Celi, L., Stanchi, S., Said-Pullicino, D., Zanini, E., & Bonifacio, E. (2016). Effects of permanent grass versus tillage on aggregation and organic matter dynamics in a poorly developed vineyard soil. *Soil Research*, 54, 797–808. <http://doi.org/10.1071/SR15277>
- Blavet, D., De Noni, G., Le Bissonnais, Y., Leonard, M., Maillo, L., Laurent, J. Y., ... Roose, E. (2009). Effect of land use and management on the early stages of soil water erosion in French Mediterranean vineyards. *Soil and Tillage Research*, 106, 124–136. <https://doi.org/10.1016/j.still.2009.04.010>
- Botton, M., de Melo, G. W. B., de Oliveira, O. L. P., & Onzi, I. (2010). Effect of cover crops on brazilian ground pearl (Hemiptera: Margarodidae) in vineyards [Efeito da cobertura vegetal sobre a pérola-da-terra (Hemiptera: Margarodidae) na cultura da videira]. *Acta Scientiarum - Agronomy*, 32, 681–684. <http://doi.org/10.4025/actasciagron.v32i4.4773> [in Portuguese]
- Bouffaud, M. L., Bernaud, E., Colombet, A., Van Tuinen, D., Wipf, D., & Redecker, D. (2016). Regional-scale analysis of arbuscular mycorrhizal fungi: The case of Burgundy vineyards. *Journal International Des Sciences de La Vigne et Du Vin*, 50, 1–8. <http://doi.org/10.20870/oeno-one.2016.50.1.49>
- Brittain, C., Bommarco, R., Vighi, M., Settele, J., & Potts, S. G. (2010). Organic farming in isolated landscapes does not benefit flower-visiting insects and pollination. *Biological Conservation*, 143(8), 1860–1867. <http://doi.org/10.1016/j.biocon.2010.04.029>
- Bruggisser, O. T., Schmidt-Entling, M. H., & Bacher, S. (2010). Effects of vineyard management on biodiversity at three trophic levels. *Biological Conservation*, 143, 1521–1528. <http://doi.org/10.1016/j.biocon.2010.03.034>
- Burns, K. N., Kluepfel, D. A., Strauss, S. L., Bokulich, N. A., Cantu, D., & Steenwerth, K. L. (2015). Vineyard soil bacterial diversity and composition revealed by 16S rRNA genes: Differentiation by geographic features. *Soil Biology & Biochemistry*, 91, 232–247. <http://doi.org/10.1016/j.soilbio.2015.09.002>

- Caprio, E., Nervo, B., Isaia, M., Allegro, G., & Rolando, A. (2015). Organic versus conventional systems in viticulture: Comparative effects on spiders and carabids in vineyards and adjacent forests. *Agricultural Systems*, *136*, 61–69. <http://doi.org/10.1016/j.agsy.2015.02.009>
- Celette, F., Wery, J., Chantelot, E., Celette, J., & Gary, C. (2005). Belowground interactions in a vine (*Vitis vinifera* L.)-tall fescue (*Festuca arundinacea* Shreb.) intercropping system: Water relations and growth. *Plant and Soil*, *276*, 205–217. <http://doi.org/10.1007/s11104-005-4415-5>
- Cluzeau, D., Descotes, A., Georget, C., Chaussod, Nouaim-Chaussod, R., Peres, G., ... Moncomble, D. (2013) *VitiEcoBioSol. The living soil of the Champagne vineyards* (Numero de contrat Ministère/ADEME: 1060C0090). Rennes, Université de Rennes. [in French]
- Coll, P., Le Cadre, E., Blanchart, E., Hinsinger, P., & Villenave, C. (2011). Organic viticulture and soil quality: A long-term study in Southern France. *Applied Soil Ecology*, *50*, 37–44. <http://doi.org/10.1016/j.apsoil.2011.07.013>
- Coll, P., Le Cadre, E., & Villenave, C. (2012). How are nematode communities affected during a conversion from conventional to organic farming in southern French vineyards? *Nematology*, *16*, 665–676. <http://doi.org/10.1163/156854112X624195>
- Costello, M., & Daane, K. (1998). Influence of ground cover on spider populations in a table grape vineyard. *Ecological Entomology*, *23*, 33–40. <http://doi.org/10.1046/j.1365-2311.1998.00108.x>
- Costello, M., & Daane, K. (2003). Spider and leafhopper (*Erythroneura* spp.) response to vineyard ground cover. *Environmental Entomology*, *32*, 1085–1089. <https://doi.org/10.1603/0046-225X-32.5.1085>
- Costello, M. J. (2010a). Grapevine and Soil Water Relations with Nodding Needlegrass (*Nassella cernua*), a California Native Grass, as a Cover Crop. *HortScience*, *45*, 621–627.
- Costello, M. J. (2010b). Growth and yield of cultivated grape with native perennial grasses nodding needlegrass or California barley as cover crops. *HortScience*, *45*, 154–156.
- Daane, K. M., & Costello, M. J. (1998). Can cover crops reduce leafhopper abundance in vineyards? *California Agriculture*, *52*, 27–33. <http://doi.org/10.3733/ca.v052n05p27>
- Danne, A., Thomson, L. J., Sharley, D. J., Penfold, C. M., & Hoffmann, A. A. (2010). Effects of Native Grass Cover Crops on Beneficial and Pest Invertebrates in Australian Vineyards. *Environmental Entomology*, *39*, 970–978. <http://doi.org/10.1603/EN09144>
- English-Loeb, G., Rhains, M., Martinson, T., & Ugine, T. (2003). Influence of flowering cover crops on *Anagrus* parasitoids (Hymenoptera : Mymaridae) and *Erythroneura* leafhoppers (Homoptera : Cicadellidae) in New York vineyards. *Agricultural and Forest Entomology*, *5*, 173–181. <http://doi.org/10.1046/j.1461-9563.2003.00179.x>
- Favretto, M. R., Paoletti, M. G., Caporali, F., Nannipieri, P., Onnis, A., & Tomei, P. E. (1992). Invertebrates and nutrients in a Mediterranean vineyard mulched with subterranean clover (*Trifolium subterraneum* L.). *Biology and Fertility of Soils*, *14*, 151–158. <http://doi.org/10.1007/BF00346055>
- Gaigher, R., & Samways, M. J. (2014). Landscape mosaic attributes for maintaining groundliving spider diversity in a biodiversity hotspot. *Insect Conservation and Diversity*, *7*, 470–479. <http://doi.org/10.1111/icad.12070>
- García-Díaz, A., Bienes, R., Sastre, B., Novara, A., Gristina, L., & Cerdà, A. (2017). Nitrogen losses in vineyards under different types of soil groundcover. A field runoff simulator approach in central Spain. *Agriculture, Ecosystems and Environment*, *236*, 256–267. <http://doi.org/10.1016/j.agee.2016.12.013>

- Giese, G., Velasco-Cruz, C., Roberts, L., Heitman, J., & Wolf, T. K. (2014). Complete vineyard floor cover crops favorably limit grapevine vegetative growth. *Scientia Horticulturae*, *170*, 256–266. <http://doi.org/10.1016/j.scienta.2014.03.011>
- Gómez, J. A., Llewellyn, C., Basch, G., Sutton, P. B., Dyson, J. S., & Jones, C. A. (2011). The effects of cover crops and conventional tillage on soil and runoff loss in vineyards and olive groves in several Mediterranean countries. *Soil Use and Management*, *27*, 502–514. <http://doi.org/10.1111/j.1475-2743.2011.00367.x>
- Hanna, R., Zalom, F. G., & Roltsch, W. J. (2003). Relative impact of spider predation and cover crop on population dynamics of *Erythroneura variabilis* in a raisin grape vineyard. *Entomologia Experimentalis et applicata*, *107*, 177–191. <http://doi.org/10.1046/j.1570-7458.2003.00051.x>
- Ingels, C. A., Scow, K. M., Whisson, D. A., & Drenovsky, R. E. (2005). Effects of cover crops on grapevines, yield, juice composition, soil microbial ecology, and gopher activity. *American Journal of Enology and Viticulture*, *56*, 19–29.
- Irvin, N. A., Bistline-East, A., & Hoddle, M. S. (2016). The effect of an irrigated buckwheat cover crop on grape vine productivity, and beneficial insect and grape pest abundance in southern California. *Biological Control*, *93*, 72–83. <http://doi.org/10.1016/j.biocontrol.2015.11.009>
- Isaia, M., Bona, F., & Badino, G. (2006). Influence of landscape diversity and agricultural practices on spider assemblage in Italian vineyards of Langa Astigiana (Northwest Italy). *Environmental Entomology*, *35*, 297–307. <https://doi.org/10.1603/0046-225X-35.2.297>
- James, D. G., Seymour, L., Lauby, G., & Buckley, K. (2015). Beauty with benefits: butterfly conservation in Washington State, USA, wine grape vineyards. *Journal of Insect Conservation*, *19*, 341–348. <http://doi.org/10.1007/s10841-015-9761-x>
- Kehinde, T., & Samways, M. (2012). Endemic pollinator response to organic vs. conventional farming and landscape context in the Cape Floristic Region biodiversity hotspot. *Agriculture, Ecosystems & Environment*, *146*, 162–167. <https://doi.org/10.1016/j.agee.2011.10.020>
- Kehinde, T., & Samways, M. J. (2014a). Insect-flower interactions: network structure in organic versus conventional vineyards. *Animal Conservation*, *17*, 401–409. <http://doi.org/10.1111/acv.12118>
- Kehinde, T., & Samways, M. J. (2014b). Management defines species turnover of bees and flowering plants in vineyards. *Agricultural and Forest Entomology*, *16*, 95–101. <http://doi.org/10.1111/afe.12038>
- King, A. P., & Berry, A. M. (2005). Vineyard  $\delta^{15}\text{N}$ , nitrogen and water status in perennial clover and bunch grass cover crop systems of California's central valley. *Agriculture, Ecosystems and Environment*, *109*, 262–272. <http://doi.org/10.1016/j.agee.2005.03.002>
- Klymenko, N. (2014). Sodding between rows and microbial preparations in the environmentally secure production of grapes. *Acta Horticulturae*, *1032*, 133–138. <http://doi.org/10.17660/ActaHortic.2014.1032.17>
- Lee, J., & Steenwerth, K. L. (2013). “Cabernet Sauvignon” grape anthocyanin increased by soil conservation practices. *Scientia Horticulturae*, *159*, 128–133. <http://doi.org/10.1016/j.scienta.2013.05.025>
- Marques, M. J., García-Muñoz, S., Muñoz-Organero, G., & Bienes, R. (2010). Soil conservation beneath grass cover in hillside vineyards under Mediterranean climatic conditions (Madrid, Spain). *Land Degradation & Development*, *21*, 122–131. <http://doi.org/10.1002/ldr.915>
- Mercenaro, L., Nieddu, G., Pulina, P., & Porqueddu, C. (2014). Sustainable management of an intercropped Mediterranean vineyard. *Agriculture, Ecosystems and Environment*, *192*, 95–104. <http://doi.org/10.1016/j.agee.2014.04.005>

- Morlat, R., & Jacquet, A. (2003). Grapevine root system and soil characteristics in a vineyard maintained long-term with or without interrow sward. *American Journal of Enology and Viticulture*, *54*, 1–7.
- Muscas, E., Cocco, A., Mercenaro, L., Cabras, M., Lentini, A., Porqueddu, C., & Nieddu, G. (2017). Effects of vineyard floor cover crops on grapevine vigor, yield, and fruit quality, and the development of the vine mealybug under a Mediterranean climate. *Agriculture, Ecosystems and Environment*, *237*, 203–212. <http://doi.org/10.1016/j.agee.2016.12.035>
- Nascimbene, J., Marini, L., & Paoletti, M. G. (2012). Organic Farming Benefits Local Plant Diversity in Vineyard Farms Located in Intensive Agricultural Landscapes. *Environmental Management*, *49*, 1054–1060. <http://doi.org/10.1007/s00267-012-9834-5>
- Novara, A., Gristina, L., Saladino, S. S., Santoro, A., & Cerda, A. (2011). Soil erosion assessment on tillage and alternative soil managements in a Sicilian vineyard. *Soil & Tillage Research*, *117*, 140–147. <http://doi.org/10.1016/j.still.2011.09.007>
- Okur, N., Kayikcioglu, H. H., Ates, F., & Yagmur, B. (2015). A comparison of soil quality and yield parameters under organic and conventional vineyard systems in Mediterranean conditions (West Turkey). *Biological Agriculture and Horticulture*, *32*, 73–84. <http://doi.org/10.1080/01448765.2015.1033645>
- Ovalle, C., del Pozo, A., Peoples, M. B., & Lavín, A. (2010). Estimating the contribution of nitrogen from legume cover crops to the nitrogen nutrition of grapevines using a <sup>15</sup>N dilution technique. *Plant and Soil*, *334*, 247–259. <http://doi.org/10.1007/s11104-010-0379-1>
- Paoletti, M. G., Sommaggio, D., Favretto, M. R., Petruzzelli, G., Pezzarossa, B., & Barbaferri, M. (1998). Earthworms as useful bioindicators of agroecosystem sustainability in orchards and vineyards with different inputs. *Applied Soil Ecology*, *10*, 137–150. [https://doi.org/10.1016/S0929-1393\(98\)00036-5](https://doi.org/10.1016/S0929-1393(98)00036-5)
- Paoletti, M. G., Squartini, A., Concheri, G., Rumiati, R. I., Mammi, S., Schievano, E., ... Giancesini, A. (2015). *VeneTerroir maggior biodiversità per un miglior vino*. (Misura124). Padova: Università degli studi di Padova. [in Italian]
- Peregrina, F., Pérez-Álvarez, E., Colina, M., & García-Escudero, E. (2012). Cover crops and tillage influence soil organic matter and nitrogen availability in a semi-arid vineyard. *Archives of Agronomy and Soil Science*, *58*, S95–S102. <http://doi.org/http://dx.doi.org/10.1080/03650340.2011.648182>
- Pérès, G., Cluzeau, D., Mercier, V., & Guernion, M. (2008). *Influence d'entretien du sol sur l'activité biologique lombricienne en vignoble Beaujolais*. [in French]
- Pérez-Álvarez, E. P., García-Escudero, E., & Peregrina, F. (2015). Soil nutrient availability under Cover Crops: Effects on vines, must, and wine in a Tempranillo Vineyard. *American Journal of Enology and Viticulture*, *66*, 311–320. <http://doi.org/10.5344/ajev.2015.14092>
- Pérez-Álvarez, E. P., Pérez-Sotés, J. L., García-Escudero, E., & Peregrina, F. (2013). Cover Crop Short-Term Effects on Soil NO<sub>3</sub> --N Availability, Nitrogen Nutritional Status, Yield, and Must Quality in a Calcareous Vineyard of the AOC Rioja, Spain. *Communications in Soil Science and Plant Analysis*, *44*, 711–721. <http://doi.org/10.1080/00103624.2013.748122>
- Pou, A., Gulías, J., Moreno, M., Tomás, M., Medrano, H., & Cifre, J. (2011). Cover cropping in *Vitis vinifera* L. cv. Manto Negro vineyards under Mediterranean conditions: Effects on plant vigour, yield and grape quality. *Journal International Des Sciences de La Vigne et Du Vin*, *45*, 223–234. <http://doi.org/10.20870/oeno-one.2011.45.4.1501>
- Probst, B., Schüler, C., & Joergensen, R. (2008). Vineyard soils under organic and conventional management—microbial biomass and activity indices and their relation to soil chemical properties. *Biology and Fertility of Soils*, *44*, 443–450. <http://doi.org/10.1007/s00374-007-0225-7>

- Reeve, A. L., Skinkis, P. A., Vance, A. J., Lee, J., & Tarara, J. M. (2016). Vineyard floor management influences “Pinot noir” vine growth and productivity more than cluster thinning. *HortScience*, *51*, 1233–1244. <http://doi.org/10.21273/HORTSC10998-16>
- Reinecke, A. J., Albertus, R. M. C., Reinecke, S. A., & Larink, O. (2008). The effects of organic and conventional management practices on feeding activity of soil organisms in vineyards. *African Zoology*, *43*, 66–74. [http://doi.org/10.3377/1562-7020\(2008\)43\[66:TEOOAC\]2.0.CO;2](http://doi.org/10.3377/1562-7020(2008)43[66:TEOOAC]2.0.CO;2)
- Rodriguez-Lovelle, B., Soyer, J. P., & Molot, C. (2000b). Nitrogen availability in vineyard soils according to soil management practices. effects on vine. *Acta Horticulturae*, *526*, 277–285. <http://doi.org/10.17660/ActaHortic.2000.526.29>
- Ruiz-Colmenero, M., Bienes, R., Eldridge, D. J., & Marques, M. J. (2013). Vegetation cover reduces erosion and enhances soil organic carbon in a vineyard in the central Spain. *CATENA*, *104*, 153–160. <http://doi.org/10.1016/j.catena.2012.11.007>
- Ruiz-Colmenero, M., Bienes, R., & Marques, M. J. (2011). Soil and water conservation dilemmas associated with the use of green cover in steep vineyards. *Soil & Tillage Research*, *117*, 211–223. <http://doi.org/10.1016/j.still.2011.10.004>
- Rusch, A., Delbac, L., & Thiéry, D. (2017). Grape moth density in Bordeaux vineyards depends on local habitat management despite effects of landscape heterogeneity on their biological control. *Journal of Applied Ecology*. <http://doi.org/10.1111/1365-2664.12858>
- Salomé, C., Coll, P., Lardo, E., Metay, A., Villenave, C., Marsden, C., ... & Le Cadre, E. (2016). The soil quality concept as a framework to assess management practices in vulnerable agroecosystems: A case study in Mediterranean vineyards. *Ecological Indicators*, *61*, 456–465. <http://doi.org/10.1016/j.ecolind.2015.09.047>
- Sharley, D. J., Hoffmann, A. A., & Thomson, L. J. (2008). The effects of soil tillage on beneficial invertebrates within the vineyard. *Agricultural and Forest Entomology*, *10*, 233–243. <http://doi.org/10.1111/j.1461-9563.2008.00376.x>
- Smith, R., Bettiga, L., & Cahn, M. (2008). Vineyard floor management affects soil, plant nutrition, and grape yield and quality. *California Agriculture*, *62*, 184–190. <http://escholarship.org/uc/item/79k913pk>
- Steenwerth, K., & Belina, K. M. (2008). Cover crops and cultivation: Impacts on soil N dynamics and microbiological function in a Mediterranean vineyard agroecosystem. *Applied Soil Ecology*, *40*, 370–380. <http://doi.org/10.1016/j.apsoil.2008.06.004>
- Steenwerth, K. L., McElrone, A. J., Calderón-Orellana, A., Hanifin, R. C., Storm, C., Collatz, W., & Manuck, C. (2013). Cover crops and tillage in a mature Merlot vineyard show few effects on grapevines. *American Journal of Enology and Viticulture*, *64*, 515–521. <http://doi.org/10.5344/ajev.2013.12119>
- Sweet, R. M., & Schreiner, R. P. (2010). Alleyway cover crops have little influence on pinot noir grapevines (*Vitis vinifera* L.) in two western Oregon vineyards. *American Journal of Enology and Viticulture*, *61*, 240–252.
- Trigo-Córdoba, E., Bouzas-Cid, Y., Orriols-Fernández, I., Díaz-Losada, E., & Mirás-Avalos, J. M. (2015). Influence of cover crop treatments on the performance of a vineyard in a humid region. *Spanish Journal of Agricultural Research*, *13*, e0907, 12 p. <http://doi.org/10.5424/sjar/2015134-8265>
- Verhulst, J., Báldi, A., & Kleijn, D. (2004). Relationship between land-use intensity and species richness and abundance of birds in Hungary. *Agriculture, Ecosystems & Environment*, *104*, 465–473. <http://doi.org/10.1016/j.agee.2004.01.043>
- Virto, I., Imaz, M. J., Fernandez-Ugalde, O., Urrutia, I., Enrique, A., & Bescansa, P. (2012). Soil quality evaluation following the implementation of permanent cover crops in semi-arid vineyards. Organic matter, physical and biological soil properties. *Spanish Journal of Agricultural Research*, *10*, 1121–1132. <http://doi.org/10.5424/sjar/2012104-613-11>
